# Supplementary material
Source: ML conference proceedings conference paper supplement (https://aclanthology.org/2026.computel-1.10)

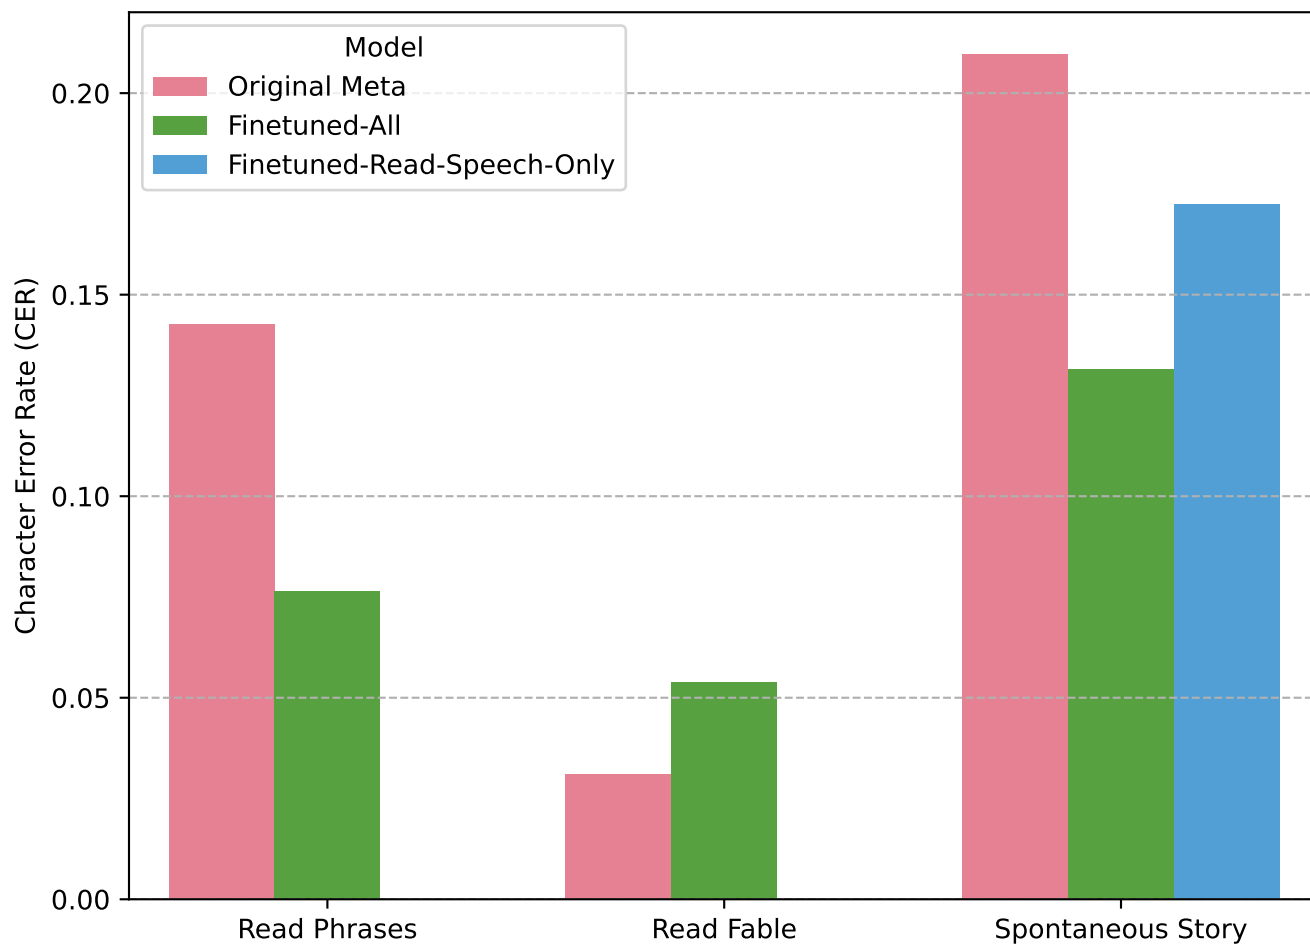

Supplement: SupplementaryMaterial [file finetuned_cer_means_final.pdf › finetuned_cer_means_final.pdf]

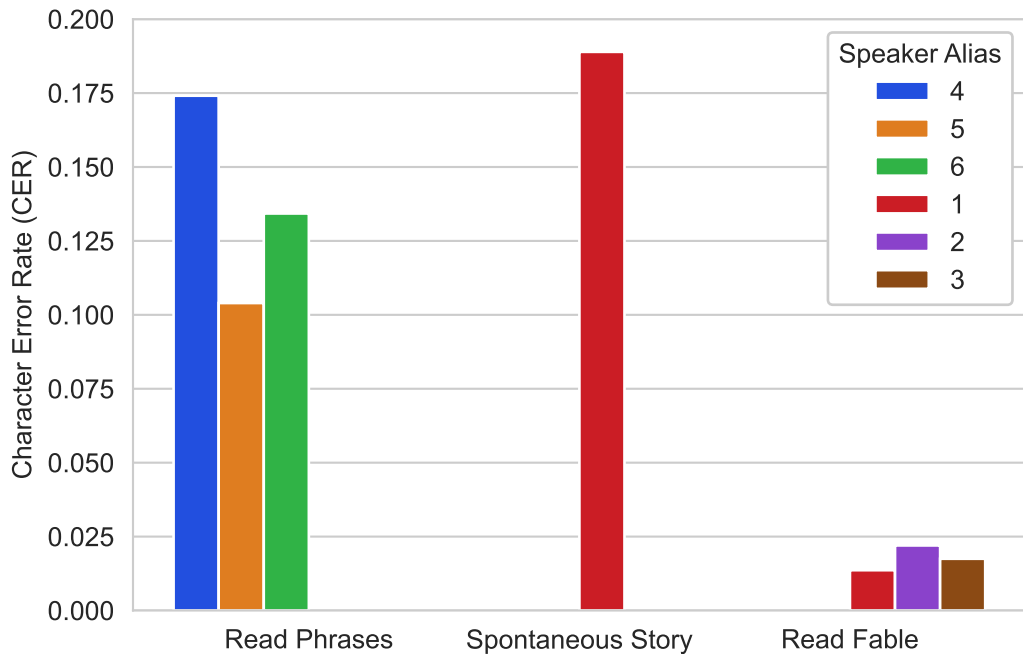

Supplement: SupplementaryMaterial [file original_cer_final.pdf › original_cer_final.pdf]

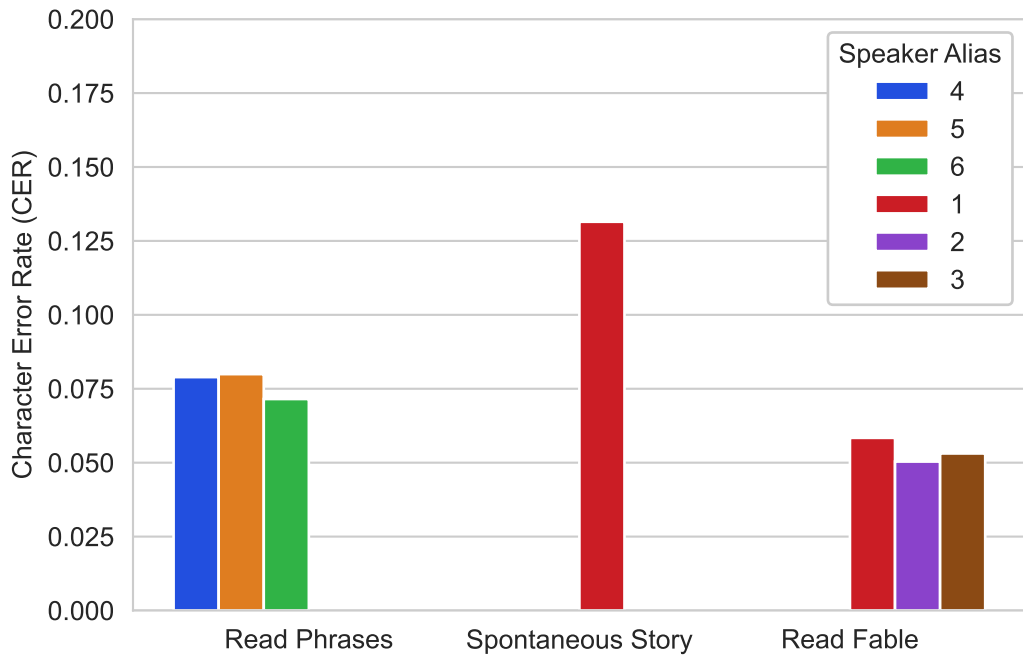

Supplement: SupplementaryMaterial [file speaker_grouped_finetuned_cer.pdf › speaker_grouped_finetuned_cer.pdf]
